# Supplementary material for: Circulating Plasma Levels of miR-20b, miR-29b and miR-155 as Predictors of Bevacizumab Efficacy in Patients with Metastatic Colorectal Cancer
Source: PubMed Central journal article supplement (PMC5796251; doi:10.3390/ijms19010307), 2018-01-20
Supplement: ijms-19-00307-s001.pdf [file ijms-19-00307-s001.pdf]

## Supplementary Materials:

Table S1. PFS and OS in relation to patient clinical pathological characteristics.

|                                  | N.pts | Median PFS (months)<br>(95% CI) | <i>p</i> | HR (95% CI)      | <i>p</i> | Median OS (months)<br>(95% CI) | <i>p</i> | HR (95% CI)      | <i>p</i> |
|----------------------------------|-------|---------------------------------|----------|------------------|----------|--------------------------------|----------|------------------|----------|
| <b>Overall</b>                   | 52    | 9.7 (8.1-14.1)                  | -        | -                | -        | 22.7 (13.1-28.8)               | -        | -                | -        |
| <b>Age (years)</b>               |       |                                 |          |                  |          |                                |          |                  |          |
| <65                              | 26    | 14.0 (9.1-25.1)                 |          | 1.00             |          | 24.8 (13.9-41.7)               |          | 1.00             |          |
| ≥65                              | 26    | 7.9 (4.7-12.4)                  | 0.014    | 2.11 (1.15-3.89) | 0.016    | 18.6 (6.1-31.6)                | 0.199    | 1.50 (0.80-2.81) | 0.202    |
| <b>Gender</b>                    |       |                                 |          |                  |          |                                |          |                  |          |
| Female                           | 17    | 9.2 (4.7-12.5)                  |          | 1.00             |          | 13.6 (5.4-49.5)                |          | 1.00             |          |
| Male                             | 35    | 11.9 (8.6-16.0)                 | 0.379    | 0.75 (0.39-1.42) | 0.381    | 24.8 (13.9-31.7)               | 0.572    | 0.82 (0.41-1.64) | 0.573    |
| <b>Performance Status (ECOG)</b> |       |                                 |          |                  |          |                                |          |                  |          |
| 0                                | 44    | 12.4 (9.1-15.7)                 |          | 1.00             |          | 25.2 (17.8-33.5)               |          | 1.00             |          |
| 1-2                              | 8     | 7.2 (0.9-9.7)                   | 0.031    | 2.32 (1.06-5.08) | 0.036    | 10.2 (0.9-14.4)                | 0.003    | 3.27 (1.45-7.41) | 0.004    |
| <b>Stage at diagnosis</b>        |       |                                 |          |                  |          |                                |          |                  |          |
| I-III                            | 12    | 12.4 (1.9-21.3)                 |          | 1.00             |          | 22.5 (11.1-47.1)               |          | 1.00             |          |
| IV                               | 40    | 9.4 (7.2-14.9)                  | 0.649    | 1.18 (0.58-2.40) | 0.650    | 23.4 (9.0-31.6)                | 0.512    | 1.28 (0.61-2.71) | 0.513    |
| <b>Tumor localization</b>        |       |                                 |          |                  |          |                                |          |                  |          |
| Rectum                           | 15    | 11.9 (4.1-21.3)                 |          | 1.00             |          | 27.1 (5.4-nr)                  |          | 1.00             |          |
| Colon                            | 37    | 9.3 (6.9-14.0)                  | 0.415    | 1.32 (0.67-2.58) | 0.417    | 20.5 (11.1-28.8)               | 0.155    | 1.70 (0.81-3.59) | 0.160    |
|                                  |       |                                 |          |                  |          |                                |          |                  |          |
| Left-sided                       | 27    | 12.4 (7.2-16.0)                 |          | 1.00             |          | 22.3 (12.7-31.7)               |          | 1.00             |          |
| Right-sided                      | 22    | 9.6 (6.9-15.7)                  | 0.778    | 0.91 (0.49-1.70) | 0.779    | 25.2 (9.0-33.5)                | 0.749    | 1.11 (0.58-2.11) | 0.749    |
| <b>Grading</b>                   |       |                                 |          |                  |          |                                |          |                  |          |
| 1-2                              | 25    | 12.9 (9.1-18.7)                 |          | 1.00             |          | 28.8 (19.3-36.7)               |          | 1.00             |          |
| 3                                | 17    | 8.1 (5.0-14.9)                  | 0.378    | 1.36 (0.68-2.72) | 0.381    | 11.9 (6.8-27.5)                | 0.219    | 1.57 (0.76-3.24) | 0.222    |
| <b>CT regimen</b>                |       |                                 |          |                  |          |                                |          |                  |          |
| FOLFOX4                          | 27    | 12.7 (7.2-21.3)                 |          | 1.00             |          | 28.8 (14.4-49.5)               |          | 1.00             |          |
| FOLFIRI                          | 25    | 9.4 (6.8-12.4)                  | 0.144    | 1.56 (0.85-2.87) | 0.148    | 13.9 (11.1-24.8)               | 0.032    | 1.99 (1.05-3.79) | 0.035    |
| <b>RAS status</b>                |       |                                 |          |                  |          |                                |          |                  |          |
| Wild type                        | 27    | 8.1 (6.1-12.5)                  |          | 1.00             |          | 14.4 (8.2-31.7)                |          | 1.00             |          |
| Mutated                          | 25    | 14.0 (9.2-18.7)                 | 0.208    | 0.68 (0.37-1.25) | 0.211    | 22.7 (13.9-47.1)               | 0.324    | 0.73 (0.39-1.37) | 0.326    |
| <b>BRAF status</b>               |       |                                 |          |                  |          |                                |          |                  |          |
| Wild type                        | 46    | 11.9 (9.1-15.7)                 |          | 1.00             |          | 24.8 (14.4-33.5)               |          | 1.00             |          |
| Mutated                          | 6     | 6.5 (4.7-12.5)                  | 0.006    | 3.41 (1.35-8.59) | 0.009    | 7.6 (4.7-27.5)                 | 0.003    | 3.62 (1.45-9.07) | 0.006    |

Table S2. Univariate analysis of PFS and OS

| Baseline        | PFS                 |          | OS                  |          |
|-----------------|---------------------|----------|---------------------|----------|
|                 | HR (95% CI)         | <i>p</i> | HR (95% CI)         | <i>p</i> |
| hsa-miR-107     | 0.999 (0.932-1.071) | 0.985    | 0.986 (0.919-1.057) | 0.682    |
| hsa-miR-126-3p  | 0.912 (0.807-1.031) | 0.142    | 0.910 (0.804-1.029) | 0.131    |
| hsa-miR-145-5p  | 1.008 (0.958-1.060) | 0.770    | 0.999 (0.949-1.052) | 0.972    |
| hsa-miR-16-5p   | 0.980 (0.929-1.034) | 0.459    | 0.959 (0.907-1.014) | 0.139    |
| hsa-miR-194-5p  | 1.011 (0.944-1.082) | 0.758    | 0.985 (0.919-1.055) | 0.660    |
| hsa-miR-199a-5p | 1.009 (0.951-1.070) | 0.769    | 0.994 (0.935-1.056) | 0.836    |
| hsa-miR-200b-3p | 1.061 (0.976-1.154) | 0.166    | 1.035 (0.951-1.125) | 0.429    |
| hsa-miR-20b-5p  | 0.931 (0.880-0.986) | 0.014    | 0.922 (0.869-0.978) | 0.007    |
| hsa-miR-21-5p   | 0.981 (0.924-1.041) | 0.522    | 0.985 (0.925-1.049) | 0.637    |
| hsa-miR-210-3p  | 0.981 (0.923-1.044) | 0.551    | 0.973 (0.912-1.038) | 0.401    |
| hsa-miR-221-3p  | 1.025 (0.970-1.084) | 0.380    | 1.035 (0.975-1.098) | 0.261    |
| hsa-miR-24-3p   | 0.998 (0.947-1.053) | 0.944    | 1.000 (0.946-1.057) | 0.999    |
| hsa-miR-27a-3p  | 1.039 (0.976-1.105) | 0.232    | 1.014 (0.954-1.077) | 0.659    |
| hsa-miR-29b-3p  | 0.868 (0.796-0.948) | 0.002    | 0.929 (0.857-1.006) | 0.070    |
| hsa-miR-335-5p  | 0.980 (0.861-1.117) | 0.766    | 0.942 (0.840-1.058) | 0.312    |
| hsa-miR-424-5p  | 0.932 (0.869-0.999) | 0.048    | 0.891 (0.827-0.960) | 0.002    |
| hsa-miR-497-5p  | 0.958 (0.887-1.033) | 0.265    | 1.006 (0.910-1.112) | 0.910    |
| hsa-miR-520d-3p | 1.014 (0.957-1.075) | 0.635    | 0.997 (0.937-1.061) | 0.924    |
| hsa-miR-92a-3p  | 1.003 (0.943-1.067) | 0.919    | 0.972 (0.913-1.035) | 0.376    |
| hsa-miR17-5p    | 0.951 (0.897-1.008) | 0.091    | 0.956 (0.900-1.015) | 0.137    |
| hsa-mir-155-5p  | 0.944 (0.885-1.007) | 0.078    | 0.941 (0.882-1.004) | 0.065    |
